# Supplementary material for: Early Transcriptional Changes in the Midgut of Ornithodoros moubata after Feeding and Infection with Borrelia duttonii
Source: MDPI journal article supplement (doi:10.3390/microorganisms10030525), 2022-02-28
Supplement: s1 [file s1]

## Supplementary Materials

**Table S1.** Basic summary of analysed samples, treatments, and sequencing results. Each sample represents the midgut of an *Ornithodoros moubata* individual

| Identifier | Treatment | Infection                          | Number of trimmed reads (millions) | Mean read length [bp] |
|------------|-----------|------------------------------------|------------------------------------|-----------------------|
| lib03352   | unfed     | non-infected                       | 7.6                                | 156                   |
| lib03353   | unfed     | non-infected                       | 9.4                                | 153                   |
| lib03354   | unfed     | non-infected                       | 7.6                                | 157                   |
| lib03355   | engorged  | non-infected                       | 8.5                                | 158                   |
| lib03356   | engorged  | non-infected                       | 9.3                                | 150                   |
| lib03357   | engorged  | non-infected                       | 11.1                               | 155                   |
| lib03358   | engorged  | <i>Borrelia duttonii</i> -infected | 9.5                                | 149                   |
| lib03359   | engorged  | <i>Borrelia duttonii</i> -infected | 8.1                                | 140                   |
| lib03360   | engorged  | <i>Borrelia duttonii</i> -infected | 11.6                               | 121                   |

**Table S2.** Additional sequencing data from *Ornithodoros moubata* included into the de novo assembly

| SRA run accession | Description                                                       | Number of reads (millions) | BioProject accession | Publication        |
|-------------------|-------------------------------------------------------------------|----------------------------|----------------------|--------------------|
| SRR12771191       | <i>Ornithodoros moubata</i> : sialotranscriptome                  | 51.4                       | PRJNA667315          | Oleaga et al. 2021 |
| SRR12771192       | <i>Ornithodoros moubata</i> : sialotranscriptome                  | 42.6                       | PRJNA667315          | Oleaga et al. 2021 |
| SRR12771193       | <i>Ornithodoros moubata</i> : sialotranscriptome                  | 40.9                       | PRJNA667315          | Oleaga et al. 2021 |
| SRR12771194       | <i>Ornithodoros moubata</i> : sialotranscriptome                  | 45.1                       | PRJNA667315          | Oleaga et al. 2021 |
| SRR12771195       | <i>Ornithodoros moubata</i> : sialotranscriptome                  | 45.6                       | PRJNA667315          | Oleaga et al. 2021 |
| SRR12771196       | <i>Ornithodoros moubata</i> : sialotranscriptome                  | 50.0                       | PRJNA667315          | Oleaga et al. 2021 |
| SRR5313934        | <i>Ornithodoros moubata</i> :<br>midgut genes after blood feeding | 26.3                       | PRJNA377416          | Oleaga et al. 2017 |
| SRR5313935        | <i>Ornithodoros moubata</i> :<br>midgut genes after blood feeding | 32.6                       | PRJNA377416          | Oleaga et al. 2017 |

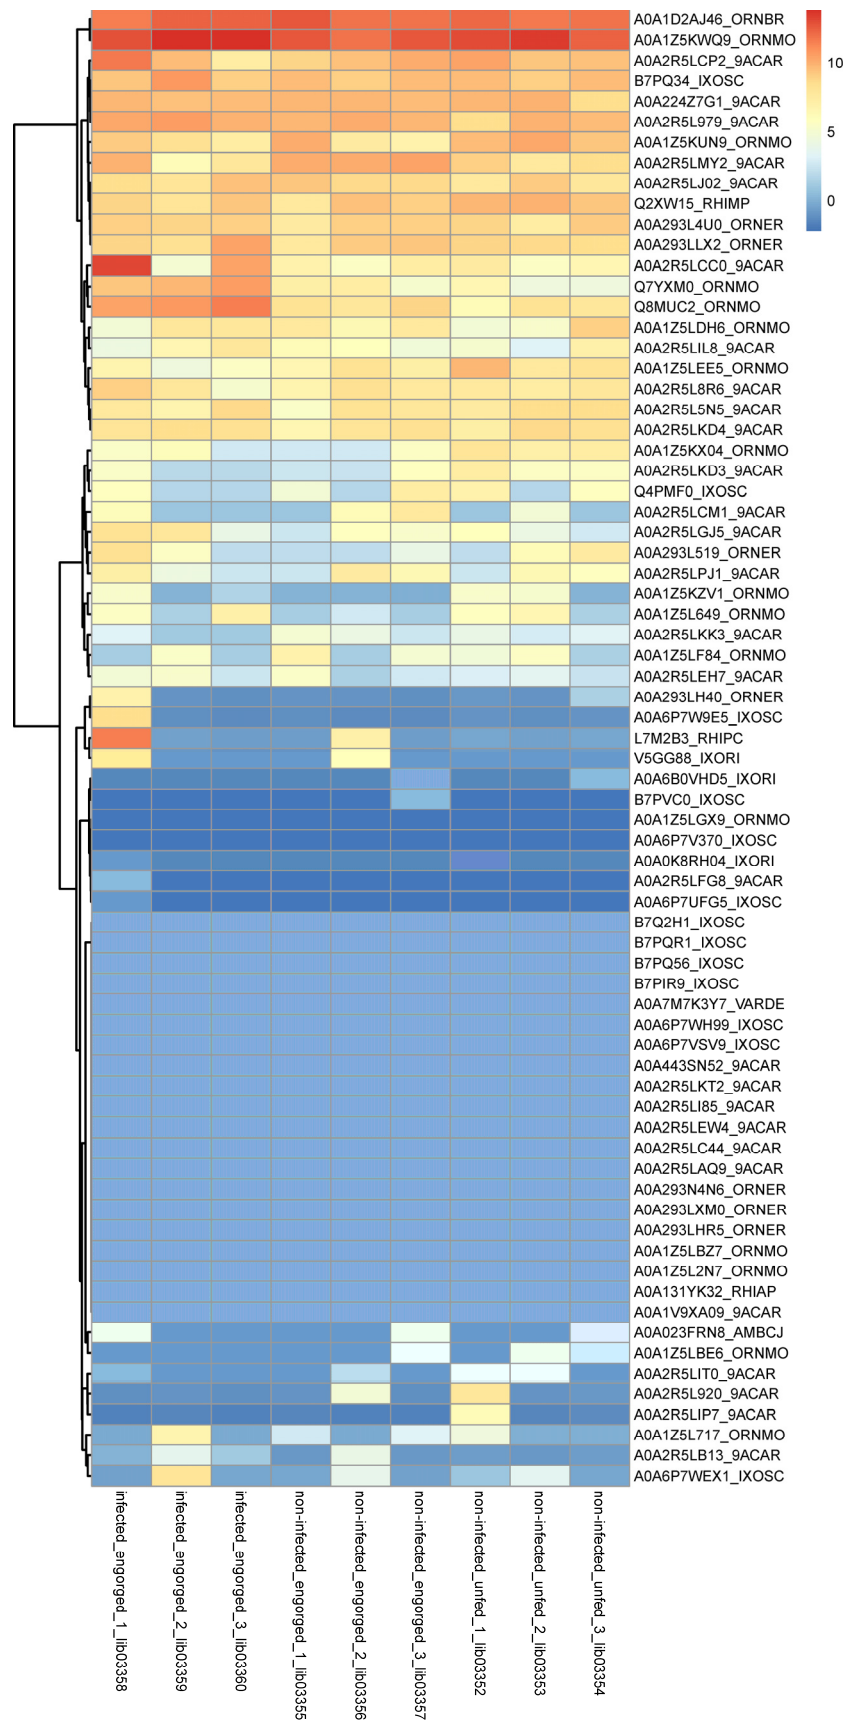

**Figure S1.** Expression data for selected immune-related transcripts in *Ornithodoros moubata*. The selected transcripts matched one of the following gene ontology terms: defence, dorin, lysozyme, oxidative stress response, antimicrobial peptide, innate immune response. The expression counts are presented as regularized log transformed data.
